# Supplementary material for: Assessing innovative care models for musculoskeletal disorders’ management in the emergency department using Time-Driven Activity-Based Costing
Source: bioRxiv or medRxiv preprint supplement (doi:10.1101/2024.08.14.24311988), 2025-01-29
Supplement: Supplementary file [file media-1.pdf]

## Methods Supplement. Method used to calculate the capacity cost rate for overhead

### 1. Budget cost centers included in the calculation of overhead

- a. Executive management
- b. Financial administration
- c. Personnel administration
- d. Professional services administration
- e. Supply and services
- f. Technical services administration
- g. Information technology
- h. Travel by ambulance to a palliative care home or for patients aged 65 and over
- i. Archives
- j. Telecommunications
- k. Food
- l. Laundry
- m. Hygiene and sanitation – Operational tasks
- n. Hygiene and sanitation – Functional tasks
- o. Biomedical waste management
- p. Hospital operations
- q. Security
- r. Maintenance of buildings and furniture / general equipment

### 2. Example of overhead calculation

#### Overhead – Emergency department

All calculations are based on data from the 2019 fiscal year.

CHU: CHU de Québec – Université Laval (5 academic hospitals located in Quebec City, Canada)

CHUL: *Centre hospitalier de l'Université Laval* (participating ED)

ED: Emergency department

*Proportion of total CHU budget attributable to the ED =*

$$\frac{\text{5 EDs budget}}{\text{CHU's total budget}}$$

*CHU's overhead attributable to the ED =*

$$\text{CHU's total overhead} * \text{proportion of total CHU budget attributable to the ED}$$

*Proportion of patients visiting an ED at the CHU and seen at the study setting =*

$$\frac{\text{Number of patients seen at the CHUL}}{\text{Number of patients seen in the 5 CHU EDs}}$$

*Overhead specific to the CHUL's ED =*

$$\text{CHU's overhead attributable to the ED} * \\ \text{proportion of patients visiting the CHUL among all patients seen in the 5 EDs of the CHU}$$
